# Supplementary material for: A complex reciprocal translocation underlies reduced bunch compactness in a grapevine somatic variant
Source: Research Square preprint supplement (doi:10.21203/rs.3.rs-7594260/v1), 2025-10-06
Supplement: Supplementary file 1 [file 2ffb462340df32738adf1d33.xlsx]

## Sheet: TableS1
Supplementary Table S1. Primer sequences.
Sequence of primers used for the amplification of the breakpoint joins of the three structural variation events identified in VP11, the ancestral unarranged chromosomes at the breakpoint sites involved in the three events (1-20), the 5.8kb deletion region in ‘Albillo Mayor’ haplotype in Tra1-3 (21) and amplicons with heterozygous SNP in 'Tempranillo Tinto' used to validate the co-segregation betw…
#	PRIMER NAME	SEQUENCE	CHR	LOCATION ON TEMPRANILLO ASEMBLY
1	B_chr01_1F	CAACATGGATGCAATAGTGACT	1	B_chr01:17440226-17440247 (+)
2	B_chr01_1R	GCCCAAAACTCTTTATGTGGAT	1	B_chr01:17441386-17441407 (-)
3	B_chr01_2F	TTACCTTCCGGTGCGAGAAA	1	B_chr01:17548776-17548796 (+)
4	B_chr01_2R	ATTCTCCGATCCTGAAAATGAACAA	1	B_chr01:17549787-17549811 (-)
5	A_chr03_1F	TCAAGAGAGTTGGAGAATGACA	3	A_chr03:7131463-7131485 (+)
6	A_chr03_1R	TTTGCCAATTGTCTATCCACTG	3	A_chr03:7132663-7132684 (-)
7	A_chr03_2F	TCTGAGTCTTTTTGGTCTACAATG	3	A_chr03:7173530-7173553 (+)
8	A_chr03_2R	TGGTGTGTTCTCGGCCATAC	3	A_chr03:7174730-7174749 (-)
9	A_chr07_1F	TTAGTTCGACGACATGTACAAATAC	7	A_chr07:22370371-22370395 (+)
10	A_chr07_2R	GTTCGGTGGAAGTTCCCTTAAA	7	A_chr07:22371504-22371525 (-)
11	A_chr11_1F	TACCCATGGTCCGTTCCTTTC	11	A_chr11:9244102-9244122 (+)
12	A_chr11_1R	ATGCTTTGCCTCTCATATGTGC	11	A_chr11:9245014-9245035 (-)
13	A_chr11_2F	AGTCTCCTTCTCTCTCAAGCAG	11	A_chr11:9265852-9265873 (+)
14	A_chr11_2R	TCCAATCCATGAGCTACTATGACC	11	A_chr11:9266999-9267022 (-)
15	A_chr08_1F	GTGTATCAATGGGCCATGTTGG	8	A_chr08:20029529-20029550 (+)
16	A_chr08_2R	GGCACTGACGGAGCTCTTAC	8	A_chr08:20030601-20030620 (-)
17	B_chr17_1F	ACATGGGTCACCTCATCCTAAT	17	B_chr17:5100770-5100791 (+)
18	B_chr17_1R	CAATATAAATCGGGCTTTGGTGGG	17	B_chr17:5101768-5101791 (+)
19	B_chr17_2F	AACAGGGTATTCCAGAATGACGAA	17	B_chr17:5123403-5123426 (+)
20	B_chr17_2R	TCTCACTTTCTCCTTTGACCGA	17	B_chr17:5124704-5124725 (-)
21	Alb_1R	CCTTCTAAACCAAATTACTCTTC	3	A_chr03:7133242-7133264 (-)
22	1UP_F	TCAAATTGTTCAAGTGATGTGGGT	1	B_chr01:16211341-16211364 (+); A_chr01:17408505-17408528 (+)
23	1UP_R	GTTGACAGGATAAGATAGGATGTGA	1	B_chr01:16212424-16212448 (-); A_chr01:17409600-17409624 (-)
24	1DOWN_F	CCTTAAGTGGCTCTCCACCC	1	B_chr01:23748709-23748728 (+); A_chr01:25160613-25160632 (+)
25	1DOWN_R	CGCTTAAGTTAGGGAGGCTCT	1	B_chr01:23749746-23749766 (-); A_chr01:25161650-25161670 (-)
26	3UP_F	AAAACCACGAGCCGTATCCC	3	A_chr03:2066755-2066774 (+); B_chr03:2001972-2001991 (+)
27	3UP_R	GCGGTCTTGATCATGATGGATT	3	A_chr03:2067878-2067899 (-); B_chr03:2003086-2003107 (-)
28	3DOWN_F	CCCACAACCACTTGAATGCG	3	A_chr03:8076065-8076084 (+); B_chr03:8036835-8036854 (+)
29	3DOWN_R	CAAGTCACCAGCCACTCCAT	3	A_chr03:8082229-8082248 (-); B_chr03:8045191-8045210 (-)

## Sheet: TableS2
Supplementary Table S2. PCR primer combinations and theoretical amplicon sizes.
List of primer combinations used for the amplification of the breakpoint joins of the three structural variation events identified in VP11, the ancestral unarranged chromosomes at the breakpoint sites involved in the three events, and amplicons with heterozygous SNP in ‘Tempranillo Tinto’ used to evaluate the segregation between chromosome 1 and 3 after the reciprocal translocation in the VP11 S1…
#	#	PRIMER PAIR		CHR. PRIMER FWD.	CHR. PRIMER REV.	AMPLICON SIZE (bp)	AMPLIF. VP11	AMPLIF. RJ51
1	2	B_chr01_1F	B_chr01_1R	1	1	1190	YES	YES
3	4	B_chr01_2F	B_chr01_2R	1	1	1026	YES	YES
5	6	A_chr03_1F	A_chr03_1R	3	3	1220	YES	YES
7	8	A_chr03_2F	A_chr03_2R	3	3	1205	YES	YES
2	6	B_chr01_1R	A_chr03_1R	1	3	913	YES	NO
3	7	B_chr01_2F	A_chr03_2F	1	3	992	YES	NO
9	10	A_chr07_1F	A_chr07_2R	7	7	1155	YES	YES
11	12	A_chr11_1F	A_chr11_1R	11	11	934	YES	YES
13	14	A_chr11_2F	A_chr11_2R	11	11	1171	YES	YES
9	12	A_chr07_1F	A_chr11_1R	7	11	965	YES	NO
13	10	A_chr11_2F	A_chr07_2R	11	7	1109	YES	NO
15	16	A_chr08_1F	A_chr08_2R	8	8	1092	YES	YES
17	18	B_chr17_1F	B_chr17_1R	17	17	1020	YES	YES
19	20	B_chr17_2F	B_chr17_2R	17	17	1321	YES	YES
15	18	A_chr08_1F	B_chr17_1R	8	17	1111	YES	NO
19	16	B_chr17_2F	A_chr08_2R	17	8	1161	YES	NO
2	21	B_chr01_1R	Alb_1R	1	3	1485	YES	NO
22	23	1UP_F	1UP_R	1	1	1100	YES	YES
24	25	1DOWN_F	1DOWN_R	1	1	1058	YES	YES
26	27	3UP_F	3UP_R	3	3	1612	YES	YES
28	29	3DOWN_F	3DOWN_R	3	3	1615	YES	YES

## Sheet: TableS3
Supplementary Table S3. Long-read whole-genome sequencing summary.
Statistics are shown for ONT basecalled raw reads, as well as for final clean reads used for SV analysis after adapter removal and filtering for length >1kb and quality >9.
ONT sequence summary	VP11_clone raw_reads	VP11_clone clean_reads	RJ51_clone raw_reads	RJ51_clone clean_reads
Total sequence (Gb)	24.6	24.4	24.9	24.6
Read N50 (bp)	17800	17774	20823	21119
Mean length (bp)	12753.9	13417.7	9166.5	10735.7
Median length (bp)	10306	10821	4302	5757
Mean quality (bp)	14	14.1	14.2	14.4
Median quality (bp)	14.1	14.2	14.2	14.4
Read number (bp)	1926572	1817871	2718420	2289833

## Sheet: TableS4
Supplementary Table S4. Read mapping depth supporting somatic duplications in VP11.
SV event	Duplicated fragment coordinates	Duplication length (bp)	Rest of chromosome coordinates	Duplicated fragment alignment Depth	Rest of chromosome alignment Depth	Duplication fold-change
Tra1-3	B_chr01:17440933-17549291	108358	B_chr01:1-17440932;B_chr01:17549292-23766831	45.9936	22.7982	2.01742
Tra1-3	A_chr03:7132253-7174026	41773	A_chr03:1-7132252;A_chr03:7174027-21447869	43.2487	22.5139	1.92098
Dup11to7	A_chr11:9244658-9266403	21745	A_chr11:1-9244657;A_chr11:9266404-25078944	48.3823	25.9291	1.86594
Dup17to8	B_chr17:5101192-5123987	22795	B_chr17:1-5101191;B_chr17:5123988-20376249	51.0182	23.0521	2.21317

## Sheet: TableS5
Supplementary Table S5. Segregation of structural variation breakpoints and reproductive-related phenotypes in VP11 and VP11 S1 progeny.
Co-segregation patterns of chromosomal structural recombinations with reproductive traits: pollen viability, seed number, and bunch compactness in clone VP11 and its S1 progeny. The presence or absence of specific recombinations is documented for each individual (including all available individuals for each trait in VP11 S1). Chi-squared tests were performed to evaluate the correlation between st…
Chi2 segregation analysis for Mendelian segregation of somatic SVs in VP11 S1 progeny					Chi2 for the independent segregation of the two translocated chromosomes in VP11 S1 progeny
Tra1-3	OBS.	EXP.	Chi2		OBSERVED	Tra1-32 (3+7) Yes	Tra1-32 (3+7) No	Chi2
Yes	24	25.5	0.552453		Tra1-31 (2+6) Yes	24	0	5.00186e-11
No	10	8.5			Tra1-31 (2+6) No	0	10
					EXPECTED	Tra1-32 (3+7) Yes	Tra1-32 (3+7) No
Dup11to7	OBS.	EXP.	Chi2		Tra1-31 (2+6) Yes	19.125	6.375
Yes	18	25.5	0.00297371		Tra1-31 (2+6) No	6.375	2.125
No	16	8.5
Dup17to8	OBS.	EXP.	Chi2
Yes	14	25.5	5.24657e-06
No	20	8.5
Genotype and phenotype of VP11 and VP11 S1 progeny individuals
INDIVIVUAL	Tra1-31 (2+6)	Tra1-32 (3+7)	chr031 (5+6)	chr012 (3+4)	chr032 (7+8)	Dup11to71 (9+12)	Dup11to72 (13+10)	chr07 (9+10)	Dup17to81 (15+18)	Dup17to82 (19+16)	chr08 (15+16)	AVERAGE POLLEN VIABILITY (%)	SD POLLEN VIABILITY (%)	FLOWER SEX	POLLEN TYPE (GRAIN APERTURES)	AVERAGE SEED NUMBER PER BERRY	SD SEED NUMBER PER BERRY	BUNCH COMPACTNESS
VP11	Yes	Yes	Yes	Yes	Yes	Yes	Yes	Yes	Yes	Yes	Yes	59.78	1.54	Hermaphrodite	Tricolporate	1.07	0.17	1
S1_VP11	---	---	---	---	---	---	---	---	---	---	---	51.3	22.51	---	---	1.37	0.46	3
S1-VP11-01	Yes	Yes	Yes	Yes	Yes	Yes	Yes	Yes	No	No	Yes	NA	NA	Female	NA	NA	NA	NA
S1-VP11-02	Yes	Yes	Yes	Yes	Yes	Yes	Yes	Yes	No	No	Yes	60.2	2.32	Hermaphrodite	Tricolporate	NA	NA	NA
S1-VP11-03	Yes	Yes	Yes	Yes	Yes	Yes	Yes	Yes	Yes	Yes	Yes	43.8	8.5	Hermaphrodite	Tricolporate	1.38	0.178885	3
S1-VP11-04	Yes	Yes	Yes	Yes	Yes	Yes	Yes	Yes	Yes	Yes	Yes	47.75	7.46	Hermaphrodite	Tricolporate	1.9	0.262996	5
S1-VP11-05	Yes	Yes	Yes	Yes	Yes	Yes	Yes	Yes	Yes	Yes	Yes	NA	NA	Hermaphrodite	NA	NA	NA	NA
S1-VP11-06	Yes	Yes	Yes	Yes	Yes	No	No	Yes	Yes	Yes	Yes	27.64	4.48	Hermaphrodite	Tricolporate	1	0	NA
S1-VP11-07	Yes	Yes	Yes	Yes	Yes	Yes	Yes	Yes	No	No	Yes	NA	NA	Hermaphrodite	NA	NA	NA	NA
S1-VP11-08	Yes	Yes	Yes	Yes	Yes	No	No	Yes	Yes	Yes	No	56.58	4.33	Female	Acolporate	1.57	0.152753	1
S1-VP11-09	No	No	Yes	No	No	No	No	Yes	No	No	Yes	69.59	23.33	Hermaphrodite	Tricolporate	1.42	0.52	3
S1-VP11-10	Yes	Yes	Yes	Yes	Yes	Yes	Yes	Yes	No	No	Yes	NA	NA	Hermaphrodite	NA	NA	NA	NA
S1-VP11-11	No	No	Yes	Yes	Yes	Yes	Yes	Yes	Yes	Yes	Yes	92.33	2.33	Hermaphrodite	NA	NA	NA	NA
S1-VP11-13	No	No	Yes	Yes	Yes	No	No	Yes	No	No	Yes	56.24	17.4	Female	Acolporate	NA	NA	NA
S1-VP11-14	No	No	Yes	Yes	Yes	No	No	Yes	No	No	Yes	87.87	8.32	Female	Acolporate	NA	NA	NA
S1-VP11-15	Yes	Yes	Yes	Yes	Yes	No	No	Yes	No	No	Yes	NA	NA	Hermaphrodite	NA	NA	NA	NA
S1-VP11-16	Yes	Yes	Yes	Yes	Yes	Yes	Yes	Yes	Yes	Yes	Yes	73.71	5.54	Hermaphrodite	Tricolporate	2	-	5
S1-VP11-17	No	No	No	Yes	Yes	No	No	Yes	No	No	Yes	NA	NA	Hermaphrodite	NA	NA	NA	NA
S1-VP11-18	No	No	Yes	No	No	No	No	Yes	No	No	Yes	NA	NA	Hermaphrodite	NA	NA	NA	NA
S1-VP11-19	No	No	No	No	No	No	No	Yes	No	No	Yes	60.51	8.63	Hermaphrodite	Tricolporate	NA	NA	NA
S1-VP11-20	No	No	Yes	Yes	Yes	No	No	Yes	No	No	Yes	72.95	12.19	Hermaphrodite	Tricolporate	1.9	0.1	5
S1-VP11-21	Yes	Yes	Yes	Yes	Yes	Yes	Yes	Yes	No	No	Yes	35.87	3.76	Female	Acolporate	NA	NA	NA
S1-VP11-22	Yes	Yes	Yes	Yes	Yes	Yes	Yes	Yes	No	No	Yes	NA	NA	Female	NA	NA	NA	NA
S1-VP11-24	Yes	Yes	Yes	Yes	Yes	No	No	Yes	Yes	Yes	Yes	NA	NA	Hermaphrodite	NA	1.6	-	3
S1-VP11-25	No	No	Yes	No	No	Yes	Yes	Yes	Yes	Yes	Yes	94.12	0.12	Female	Acolporate	1.48	0.183485	1
S1-VP11-26	Yes	Yes	Yes	Yes	Yes	No	No	Yes	No	No	No	66.11	12.86	Female	Acolporate	1.3	0.1	NA
S1-VP11-27	Yes	Yes	Yes	Yes	Yes	Yes	Yes	Yes	No	No	Yes	51.91	4.81	Hermaphrodite	Tricolporate	0.95	0.0707107	NA
S1-VP11-28	Yes	Yes	Yes	Yes	Yes	No	No	Yes	Yes	Yes	Yes	30.64	13.69	Hermaphrodite	Tricolporate	1.63	0.416333	NA
S1-VP11-29	Yes	Yes	Yes	Yes	Yes	No	No	Yes	No	No	Yes	NA	NA	Hermaphrodite	NA	0.47	0.057735	NA
S1-VP11-30	Yes	Yes	Yes	Yes	Yes	Yes	Yes	Yes	No	No	Yes	47.19	12.68	Female	Acolporate	NA	NA	NA
S1-VP11-31	Yes	Yes	Yes	Yes	Yes	Yes	Yes	Yes	Yes	Yes	Yes	26.47	20.47	Female	Acolporate	NA	NA	NA
S1-VP11-32	No	No	Yes	No	No	No	No	Yes	Yes	Yes	Yes	NA	NA	Hermaphrodite	NA	NA	NA	NA
S1-VP11-33	Yes	Yes	Yes	Yes	Yes	Yes	Yes	Yes	No	No	Yes	46.41	2.12	Female	Acolporate	1.12	0.705455	1
S1-VP11-34	Yes	Yes	Yes	Yes	No	No	No	No	No	No	No	39.54	10.8	Female	Acolporate	1.5	0.141421	3
S1-VP11-35	Yes	Yes	Yes	Yes	Yes	Yes	Yes	Yes	Yes	Yes	Yes	44.5	4.31	Hermaphrodite	Tricolporate	1.25	0.242899	3
S1-VP11-36	Yes	Yes	Yes	Yes	Yes	Yes	Yes	Yes	Yes	Yes	Yes	37.38	11.09	Female	Acolporate	0.47	0.265832	1

## Sheet: TableS6
Supplementary Table S6. Lack of segregation of structural variation breakpoints and segregation of reproductive-related phenotypes in RJ51 and RJ51 S1 progeny.
Co-segregation patterns of chromosomal structural recombinations with reproductive traits: pollen viability, seed number and bunch compactness in clone RJ51 and its S1 progeny. The presence or absence of specific recombinations is documented for each individual (at least 10 individuals per trait). Chi-squared tests were performed to evaluate the correlation between structural variations and these…
INDIVIVUAL	Tra1-31 (2+6)	Tra1-32 (3+7)	chr011 (1+2)	chr031 (5+6)	chr012 (3+4)	chr32 (7+8)	Dup11to71 (9+12)	Dup11to72 (13+10)	chr07 (9+10)	chr111 (11+12)	chr112 (13+14)	Dup17to81 (15+18)	Dup17to82 (19+16)	chr08 (15+16)	chr171 (17+18)	chr172 (19+20)	AVERAGE POLLEN VIABILITY (%)	SD POLLEN VIABILITY (%)	FLOWER SEX	POLLEN TYPE (GRAIN APERTURES)	AVERAGE SEED NUMBER PER BERRY	SD SEED NUMBER PER BERRY	BUNCH COMPACTNESS
RJ51	No	No	Yes	Yes	Yes	Yes	No	No	Yes	Yes	Yes	No	No	Yes	Yes	Yes	96.95	3.68	Female	Tricolporate	2.76	0.22	9
S1-RJ51	No	No	Yes	Yes	Yes	Yes	No	No	Yes	Yes	Yes	No	No	Yes	Yes	Yes	73.98	21.9	Hermaphrodite	---	1.44	0.54	3
S1-RJ51-02	No	No	Yes	Yes	Yes	Yes	No	No	Yes	Yes	Yes	No	No	Yes	Yes	Yes	59.41	5.02	Hermaphrodite	Tricolporate	0.866667	0.152753	1
S1-RJ51-04	No	No	Yes	Yes	Yes	Yes	No	No	Yes	Yes	Yes	No	No	Yes	Yes	Yes	96.38	1.29	Hermaphrodite	Tricolporate	1.36667	0.208167	3
S1-RJ51-08	No	No	Yes	Yes	Yes	Yes	No	No	Yes	Yes	Yes	No	No	Yes	Yes	Yes	89.66	4.14	Hermaphrodite	Tricolporate	0.833333	0.057735	3
S1-RJ51-09	No	No	Yes	Yes	Yes	Yes	No	No	Yes	Yes	Yes	No	No	Yes	Yes	Yes	86.51	1.5	Hermaphrodite	Tricolporate	1.16667	0.11547	5
S1-RJ51-10	No	No	Yes	Yes	Yes	Yes	No	No	Yes	Yes	Yes	No	No	Yes	Yes	Yes	83.62	2.78	Hermaphrodite	Tricolporate	1.56667	0.196638	7
S1-RJ51-11	No	No	Yes	Yes	Yes	Yes	No	No	Yes	Yes	Yes	No	No	Yes	Yes	Yes	91.41	2.53	Female	Tricolporate	1.46667	0.351188	5
S1-RJ51-15	No	No	Yes	Yes	Yes	Yes	No	No	Yes	Yes	Yes	No	No	Yes	Yes	Yes	NA	NA	Hermaphrodite	NA	1	0.1	3
S1-RJ51-16	No	No	Yes	Yes	Yes	Yes	No	No	Yes	Yes	Yes	No	No	Yes	Yes	Yes	NA	NA	Hermaphrodite	NA	1.2	0.173205	3
S1-RJ51-17	No	No	Yes	Yes	Yes	Yes	No	No	Yes	Yes	Yes	No	No	Yes	Yes	Yes	NA	NA	Hermaphrodite	NA	0.966667	0.208167	5
S1-RJ51-20	No	No	Yes	Yes	Yes	Yes	No	No	Yes	Yes	Yes	No	No	Yes	Yes	Yes	NA	NA	Female	NA	2.7	-	3
S1-RJ51-21	No	No	Yes	Yes	Yes	Yes	No	No	Yes	Yes	Yes	No	No	Yes	Yes	Yes	87.87	1.01	Female	Tricolporate	1.6	0.360555	3
S1-RJ51-22	No	No	Yes	Yes	Yes	Yes	No	No	Yes	Yes	Yes	No	No	Yes	Yes	Yes	31.62	6.64	Hermaphrodite	Acolporate	1.03333	0.351188	3
S1-RJ51-24	No	No	Yes	Yes	Yes	Yes	No	No	Yes	Yes	Yes	No	No	Yes	Yes	Yes	67.02	5.08	Hermaphrodite	Tricolporate	1.66667	0.057735	7
S1-RJ51-26	No	No	Yes	Yes	Yes	Yes	No	No	Yes	Yes	Yes	No	No	Yes	Yes	Yes	46.3	6.98	Hermaphrodite	Tricolporate	1.71667	0.343026	5
S1-RJ51-31	No	No	Yes	Yes	Yes	Yes	No	No	Yes	Yes	Yes	No	No	Yes	Yes	Yes	NA	NA	Hermaphrodite	NA	0.966667	0.152753	3
S1-RJ51-34	No	No	Yes	Yes	Yes	Yes	No	No	Yes	Yes	Yes	No	No	Yes	Yes	Yes	NA	NA	Hermaphrodite	NA	1.5	0.2	3
S1-RJ51-47	No	No	Yes	Yes	Yes	Yes	No	No	Yes	Yes	Yes	No	No	Yes	Yes	Yes	NA	NA	Hermaphrodite	NA	1.43333	0.152753	3
S1-RJ51-56	No	No	Yes	Yes	Yes	Yes	No	No	Yes	Yes	Yes	No	No	Yes	Yes	Yes	NA	NA	Female	NA	1.73333	0.057735	5
S1-RJ51-61	No	No	Yes	Yes	Yes	Yes	No	No	Yes	Yes	Yes	No	No	Yes	Yes	Yes	NA	NA	Female	NA	1.56667	0.378594	1
S1-RJ51-73	No	No	Yes	Yes	Yes	Yes	No	No	Yes	Yes	Yes	No	No	Yes	Yes	Yes	NA	NA	Hermaphrodite	NA	1.4	0.1	5
S1-RJ51-87	No	No	Yes	Yes	Yes	Yes	No	No	Yes	Yes	Yes	No	No	Yes	Yes	Yes	NA	NA	Female	NA	0.733333	0.251661	3
S1-RJ51-120	No	No	Yes	Yes	Yes	Yes	No	No	Yes	Yes	Yes	No	No	Yes	Yes	Yes	NA	NA	Female	NA	1.13333	0.057735	1
S1-RJ51-121	No	No	Yes	Yes	Yes	Yes	No	No	Yes	Yes	Yes	No	No	Yes	Yes	Yes	NA	NA	Hermaphrodite	NA	2.63333	0.51316	7
S1-RJ51-126	No	No	Yes	Yes	Yes	Yes	No	No	Yes	Yes	Yes	No	No	Yes	Yes	Yes	NA	NA	Hermaphrodite	NA	2.8	0.2	9
S1-RJ51-130	No	No	Yes	Yes	Yes	Yes	No	No	Yes	Yes	Yes	No	No	Yes	Yes	Yes	NA	NA	Hermaphrodite	NA	1.2	0.1	3
S1-RJ51-132	No	No	Yes	Yes	Yes	Yes	No	No	Yes	Yes	Yes	No	No	Yes	Yes	Yes	NA	NA	Female	NA	1.2	0.141421	3
S1-RJ51-145	No	No	Yes	Yes	Yes	Yes	No	No	Yes	Yes	Yes	No	No	Yes	Yes	Yes	NA	NA	Female	NA	1.5	0.173205	5

## Sheet: TableS8 (2)
Supplementary Table S7. SNP segregation from chromosomes 1 and 3 in VP11 clone and S1 population.
Segregation analysis of heterozygous single nucleotide polymorphisms (SNPs) was performed as validation of the event Tra1-3 as a heterozygous reciprocal translocation. Two primer pairs were designed at each side of the translocation junctions in each chromosome, were separated by 6 Mb on chromosome Achr03 (primers 3UP, 3DOWN) and 7 Mb on chromosome Bchr01 (primers 1UP, 1DOWN). Chi-squared was per…
INDIVIDUAL	TRA1-3	1UP	1UP	1DOWN	1DOWN	3UP	3UP	3DOWN	3DOWN	1UP1DOWN	3UP3DOWN		1UP3UP	1DOWN3DOWN		1UP - 1DOWN								3UP - 3DOWN
VP11	YES	A1	B1	A1	B1	A3	B3	A3	B3	A1B1-A1B1	A3B3-A3B3		A1B1-A3B3	A1B1-A3B3		ALLELE SEGREGATION	OBS.	FREQ.	EXP.	CHI2	FREQ. RJ51	EXP. RJ51	CHI2	ALLELE SEGREGATION	OBS.	FREQ.	EXP.	CHI2	FREQ. RJ51	EXP. RJ51	CHI2
S1-VP11-01	YES	A1	B1	A1	A1	A3	B3	A3	B3	A1B1-A1A1	A3B3-A3B3		A1B1-A3B3	A1A1-A3B3		A1A1-A1A1	2	0.0625	2.125	0.0391335	0.117647	4	0.373048	A3A3-A3A3	3	0.0625	2.125	0.248898	0.205882	7	0.0326995
S1-VP11-02	YES	A1	B1	A1	B1	A3	A3	A3	B3	A1B1-A1B1	A3A3-A3B3		A1B1-A3A3	A1B1-A3B3		A1B1-A1A1	8	0.125	4.25		0.117647	4		A3B3-A3A3	1	0.125	4.25		0.117647	4
S1-VP11-03	YES	A1	B1	A1	B1	A3	B3	A3	B3	A1B1-A1B1	A3B3-A3B3		A1B1-A3B3	A1B1-A3B3		B1B1-A1A1	0	0.0625	2.125		0			B3B3-A3A3	3	0.0625	2.125		0.0588235	2
S1-VP11-04	YES	A1	B1	A1	A1	A3	B3	A3	B3	A1B1-A1A1	A3B3-A3B3		A1B1-A3B3	A1A1-A3B3		A1A1-A1B1	3	0.125	4.25		0.117647	4		A3A3-A3B3	4	0.125	4.25		0.0294118	1
S1-VP11-05	YES	A1	B1	B1	B1	A3	A3	A3	A3	A1B1-B1B1	A3A3-A3A3		A1B1-A3A3	B1B1-A3A3		A1B1-A1B1	15	0.25	8.5		0.470588	16		A3B3-A3B3	14	0.25	8.5		0.294118	10
S1-VP11-06	YES	A1	B1	A1	B1	A3	B3	A3	B3	A1B1-A1B1	A3B3-A3B3		A1B1-A3B3	A1B1-A3B3		B1B1-A1B1	2	0.125	4.25		0			B3B3-A3B3	5	0.125	4.25		0.235294	8
S1-VP11-07	YES	A1	B1	A1	B1	A3	B3	A3	B3	A1B1-A1B1	A3B3-A3B3		A1B1-A3B3	A1B1-A3B3		A1A1-B1B1	0	0.0625	2.125		0			A3A3-B3B3	0	0.0625	2.125		0
S1-VP11-08	YES	A1	B1	A1	A1	B3	B3	A3	B3	A1B1-A1A1	B3B3-A3B3		A1B1-B3B3	A1A1-A3B3		A1B1-B1B1	4	0.125	4.25		0.0882353	3		A3B3-B3B3	2	0.125	4.25		0.0588235	2
S1-VP11-09	NO	A1	B1	A1	B1	A3	B3	B3	B3	A1B1-A1B1	A3B3-B3B3		A1B1-A3B3	A1B1-B3B3		B1B1-B1B1	0	0.0625	2.125		0.0882353	3		B3B3-B3B3	2	0.0625	2.125		0
S1-VP11-10	YES	A1	B1	A1	B1	A3	B3	A3	A3	A1B1-A1B1	A3B3-A3A3		A1B1-A3B3	A1B1-A3A3			34	1	34		1				34	1	34		1
S1-VP11-11	NO	A1	A1	A1	B1	B3	B3	A3	B3	A1A1-A1B1	B3B3-A3B3		A1A1-B3B3	A1B1-A3B3
S1-VP11-13	NO	B1	B1	A1	B1	B3	B3	A3	A3	B1B1-A1B1	B3B3-A3A3		B1B1-B3B3	A1B1-A3A3
S1-VP11-14	NO	B1	B1	A1	B1	A3	B3	B3	B3	B1B1-A1B1	A3B3-B3B3		B1B1-A3B3	A1B1-B3B3		1UP - 3UP								1DOWN - 3DOWN
S1-VP11-15	YES	A1	B1	A1	B1	A3	B3	A3	B3	A1B1-A1B1	A3B3-A3B3		A1B1-A3B3	A1B1-A3B3		ALLELE SEGREGATION	OBS.	FREQ.	EXP.	CHI2	FREQ. RJ51	EXP. RJ51	CHI2	ALLELE SEGREGATION	OBS.	FREQ.	EXP.	CHI2	FREQ. RJ51	EXP. RJ51	CHI2
S1-VP11-16	YES	A1	B1	A1	A1	A3	A3	A3	A3	A1B1-A1A1	A3A3-A3A3		A1B1-A3A3	A1A1-A3A3		A1A1-A3A3	2	0.0625	2.125	0.0271881	0.0588235	2	0.653694	A1A1-A3A3	2	0.0625	2.125	0.265026	0.0588235	2	0.393642
S1-VP11-17	NO	A1	B1	A1	B1	B3	B3	A3	A3	A1B1-A1B1	B3B3-A3A3		A1B1-B3B3	A1B1-A3A3		A1B1-A3A3	5	0.125	4.25		0.117647	4		A1B1-A3A3	3	0.125	4.25		0.205882	7
S1-VP11-18	NO	A1	A1	A1	A1	B3	B3	B3	B3	A1A1-A1A1	B3B3-B3B3		A1A1-B3B3	A1A1-B3B3		B1B1-A3A3	0	0.0625	2.125		0.0588235	2		B1B1-A3A3	2	0.0625	2.125		0.117647	4
S1-VP11-19	NO	A1	B1	A1	A1	B3	B3	A3	A3	A1B1-A1A1	B3B3-A3A3		A1B1-B3B3	A1A1-A3A3		A1A1-A3B3	0	0.125	4.25		0.0882353	3		A1A1-A3B3	7	0.125	4.25		0.147059	5
S1-VP11-20	NO	A1	A1	A1	B1	A3	A3	A3	B3	A1A1-A1B1	A3A3-A3B3		A1A1-A3A3	A1B1-A3B3		A1B1-A3B3	16	0.25	8.5		0.382353	13		A1B1-A3B3	14	0.25	8.5		0.352941	12
S1-VP11-21	YES	A1	B1	B1	B1	A3	B3	A3	B3	A1B1-B1B1	A3B3-A3B3		A1B1-A3B3	B1B1-A3B3		B1B1-A3B3	1	0.125	4.25		0			B1B1-A3B3	2	0.125	4.25		0.0588235	2
S1-VP11-22	YES	A1	A1	A1	A1	A3	A3	A3	B3	A1A1-A1A1	A3A3-A3B3		A1A1-A3A3	A1A1-A3B3		A1A1-B3B3	3	0.0625	2.125		0.0882353	3		A1A1-B3B3	1	0.0625	2.125		0.0294118	1
S1-VP11-24	YES	A1	B1	A1	A1	A3	B3	A3	B3	A1B1-A1A1	A3B3-A3B3		A1B1-A3B3	A1A1-A3B3		A1B1-B3B3	6	0.125	4.25		0.176471	6		A1B1-B3B3	3	0.125	4.25		0.0294118	1
S1-VP11-25	NO	A1	B1	A1	A1	B3	B3	A3	B3	A1B1-A1A1	B3B3-A3B3		A1B1-B3B3	A1A1-A3B3		B1B1-B3B3	1	0.0625	2.125		0.0294118	1		B1B1-B3B3	0	0.0625	2.125		0
S1-VP11-26	YES	A1	B1	B1	B1	A3	A3	A3	A3	A1B1-B1B1	A3A3-A3A3		A1B1-A3A3	B1B1-A3A3			34	1	34		1				34	1	34		1
S1-VP11-27	YES	A1	B1	A1	B1	B3	B3	A3	B3	A1B1-A1B1	B3B3-A3B3		A1B1-B3B3	A1B1-A3B3
S1-VP11-28	YES	A1	B1	A1	B1	B3	B3	A3	B3	A1B1-A1B1	B3B3-A3B3		A1B1-B3B3	A1B1-A3B3
S1-VP11-29	YES	A1	B1	B1	B1	A3	B3	A3	B3	A1B1-B1B1	A3B3-A3B3		A1B1-A3B3	B1B1-A3B3
S1-VP11-30	YES	A1	B1	A1	B1	A3	B3	A3	B3	A1B1-A1B1	A3B3-A3B3		A1B1-A3B3	A1B1-A3B3			COUNT
S1-VP11-31	YES	A1	B1	A1	A1	A3	B3	A3	B3	A1B1-A1A1	A3B3-A3B3		A1B1-A3B3	A1A1-A3B3		A1
S1-VP11-32	NO	A1	A1	A1	B1	B3	B3	B3	B3	A1A1-A1B1	B3B3-B3B3		A1A1-B3B3	A1B1-B3B3
S1-VP11-33	YES	A1	B1	A1	B1	A3	B3	A3	B3	A1B1-A1B1	A3B3-A3B3		A1B1-A3B3	A1B1-A3B3
S1-VP11-34	YES	A1	B1	A1	B1	A3	B3	A3	B3	A1B1-A1B1	A3B3-A3B3		A1B1-A3B3	A1B1-A3B3
S1-VP11-35	YES	A1	B1	A1	B1	A3	B3	A3	B3	A1B1-A1B1	A3B3-A3B3		A1B1-A3B3	A1B1-A3B3
S1-VP11-36	YES	A1	B1	A1	B1	A3	A3	A3	B3	A1B1-A1B1	A3A3-A3B3		A1B1-A3A3	A1B1-A3B3

## Sheet: TableS8 (3)
Supplementary Table S7. SNP segregation from chromosomes 1 and 3 in VP11 clone and S1 population.
Segregation analysis of heterozygous single nucleotide polymorphisms (SNPs) was performed as validation of the event Tra1-3 as a heterozygous reciprocal translocation. Two primer pairs were designed at each side of the translocation junctions in each chromosome, were separated by 6 Mb on chromosome Achr03 (primers 3UP, 3DOWN) and 7 Mb on chromosome Bchr01 (primers 1UP, 1DOWN). Chi-squared was per…
INDIVIDUAL	TRA1-3	1UP	1UP	1DOWN	1DOWN	3UP	3UP	3DOWN	3DOWN	1UP1DOWN	3UP3DOWN	1UP3UP	1DOWN3DOWN	ALL		1UP - 1DOWN								3UP - 3DOWN
VP11	YES	A1	B1	A1	B1	A3	B3	A3	B3	A1B1-A1B1	A3B3-A3B3	A1B1-A3B3	A1B1-A3B3	A1B1-A1B1-A3B3-A3B3		ALLELE SEGREGATION	OBS.	FREQ.	EXP.	CHI2	FREQ. RJ51	EXP. RJ51	CHI2	ALLELE SEGREGATION	OBS.	FREQ.	EXP.	CHI2	FREQ. RJ51	EXP. RJ51	CHI2
S1-VP11-01	YES	A1	B1	A1	A1	A3	B3	A3	B3	A1B1-A1A1	A3B3-A3B3	A1B1-A3B3	A1A1-A3B3	A1B1-A1A1-A3B3-A3B3		A1A1-A1A1	2	0.0625	2.125	0.0391335	0.117647	4	0.373048	A3A3-A3A3	3	0.0625	2.125	0.248898	0.205882	7	0.0326995
S1-VP11-02	YES	A1	B1	A1	B1	A3	A3	A3	B3	A1B1-A1B1	A3A3-A3B3	A1B1-A3A3	A1B1-A3B3	A1B1-A1B1-A3A3-A3B3		A1B1-A1A1	8	0.125	4.25		0.117647	4		A3B3-A3A3	1	0.125	4.25		0.117647	4
S1-VP11-03	YES	A1	B1	A1	B1	A3	B3	A3	B3	A1B1-A1B1	A3B3-A3B3	A1B1-A3B3	A1B1-A3B3	A1B1-A1B1-A3B3-A3B3		B1B1-A1A1	0	0.0625	2.125		0			B3B3-A3A3	3	0.0625	2.125		0.0588235	2
S1-VP11-04	YES	A1	B1	A1	A1	A3	B3	A3	B3	A1B1-A1A1	A3B3-A3B3	A1B1-A3B3	A1A1-A3B3	A1B1-A1A1-A3B3-A3B3		A1A1-A1B1	3	0.125	4.25		0.117647	4		A3A3-A3B3	4	0.125	4.25		0.0294118	1
S1-VP11-05	YES	A1	B1	B1	B1	A3	A3	A3	A3	A1B1-B1B1	A3A3-A3A3	A1B1-A3A3	B1B1-A3A3	A1B1-B1B1-A3A3-A3A3		A1B1-A1B1	15	0.25	8.5		0.470588	16		A3B3-A3B3	14	0.25	8.5		0.294118	10
S1-VP11-06	YES	A1	B1	A1	B1	A3	B3	A3	B3	A1B1-A1B1	A3B3-A3B3	A1B1-A3B3	A1B1-A3B3	A1B1-A1B1-A3B3-A3B3		B1B1-A1B1	2	0.125	4.25		0			B3B3-A3B3	5	0.125	4.25		0.235294	8
S1-VP11-07	YES	A1	B1	A1	B1	A3	B3	A3	B3	A1B1-A1B1	A3B3-A3B3	A1B1-A3B3	A1B1-A3B3	A1B1-A1B1-A3B3-A3B3		A1A1-B1B1	0	0.0625	2.125		0			A3A3-B3B3	0	0.0625	2.125		0
S1-VP11-08	YES	A1	B1	A1	A1	B3	B3	A3	B3	A1B1-A1A1	B3B3-A3B3	A1B1-B3B3	A1A1-A3B3	A1B1-A1A1-B3B3-A3B3		A1B1-B1B1	4	0.125	4.25		0.0882353	3		A3B3-B3B3	2	0.125	4.25		0.0588235	2
S1-VP11-09	NO	A1	B1	A1	B1	A3	B3	B3	B3	A1B1-A1B1	A3B3-B3B3	A1B1-A3B3	A1B1-B3B3	A1B1-A1B1-A3B3-B3B3		B1B1-B1B1	0	0.0625	2.125		0.0882353	3		B3B3-B3B3	2	0.0625	2.125		0
S1-VP11-10	YES	A1	B1	A1	B1	A3	B3	A3	A3	A1B1-A1B1	A3B3-A3A3	A1B1-A3B3	A1B1-A3A3	A1B1-A1B1-A3B3-A3A3			34	1	34		1				34	1	34		1
S1-VP11-11	NO	A1	A1	A1	B1	B3	B3	A3	B3	A1A1-A1B1	B3B3-A3B3	A1A1-B3B3	A1B1-A3B3	A1A1-A1B1-B3B3-A3B3
S1-VP11-13	NO	B1	B1	A1	B1	B3	B3	A3	A3	B1B1-A1B1	B3B3-A3A3	B1B1-B3B3	A1B1-A3A3	B1B1-A1B1-B3B3-A3A3
S1-VP11-14	NO	B1	B1	A1	B1	A3	B3	B3	B3	B1B1-A1B1	A3B3-B3B3	B1B1-A3B3	A1B1-B3B3	B1B1-A1B1-A3B3-B3B3		1UP - 3UP								1DOWN - 3DOWN
S1-VP11-15	YES	A1	B1	A1	B1	A3	B3	A3	B3	A1B1-A1B1	A3B3-A3B3	A1B1-A3B3	A1B1-A3B3	A1B1-A1B1-A3B3-A3B3		ALLELE SEGREGATION	OBS.	FREQ.	EXP.	CHI2	FREQ. RJ51	EXP. RJ51	CHI2	ALLELE SEGREGATION	OBS.	FREQ.	EXP.	CHI2	FREQ. RJ51	EXP. RJ51	CHI2
S1-VP11-16	YES	A1	B1	A1	A1	A3	A3	A3	A3	A1B1-A1A1	A3A3-A3A3	A1B1-A3A3	A1A1-A3A3	A1B1-A1A1-A3A3-A3A3		A1A1-A3A3	2	0.0625	2.125	0.0271881	0.0588235	2	0.653694	A1A1-A3A3	2	0.0625	2.125	0.265026	0.0588235	2	0.393642
S1-VP11-17	NO	A1	B1	A1	B1	B3	B3	A3	A3	A1B1-A1B1	B3B3-A3A3	A1B1-B3B3	A1B1-A3A3	A1B1-A1B1-B3B3-A3A3		A1B1-A3A3	5	0.125	4.25		0.117647	4		A1B1-A3A3	3	0.125	4.25		0.205882	7
S1-VP11-18	NO	A1	A1	A1	A1	B3	B3	B3	B3	A1A1-A1A1	B3B3-B3B3	A1A1-B3B3	A1A1-B3B3	A1A1-A1A1-B3B3-B3B3		B1B1-A3A3	0	0.0625	2.125		0.0588235	2		B1B1-A3A3	2	0.0625	2.125		0.117647	4
S1-VP11-19	NO	A1	B1	A1	A1	B3	B3	A3	A3	A1B1-A1A1	B3B3-A3A3	A1B1-B3B3	A1A1-A3A3	A1B1-A1A1-B3B3-A3A3		A1A1-A3B3	0	0.125	4.25		0.0882353	3		A1A1-A3B3	7	0.125	4.25		0.147059	5
S1-VP11-20	NO	A1	A1	A1	B1	A3	A3	A3	B3	A1A1-A1B1	A3A3-A3B3	A1A1-A3A3	A1B1-A3B3	A1A1-A1B1-A3A3-A3B3		A1B1-A3B3	16	0.25	8.5		0.382353	13		A1B1-A3B3	14	0.25	8.5		0.352941	12
S1-VP11-21	YES	A1	B1	B1	B1	A3	B3	A3	B3	A1B1-B1B1	A3B3-A3B3	A1B1-A3B3	B1B1-A3B3	A1B1-B1B1-A3B3-A3B3		B1B1-A3B3	1	0.125	4.25		0			B1B1-A3B3	2	0.125	4.25		0.0588235	2
S1-VP11-22	YES	A1	A1	A1	A1	A3	A3	A3	B3	A1A1-A1A1	A3A3-A3B3	A1A1-A3A3	A1A1-A3B3	A1A1-A1A1-A3A3-A3B3		A1A1-B3B3	3	0.0625	2.125		0.0882353	3		A1A1-B3B3	1	0.0625	2.125		0.0294118	1
S1-VP11-24	YES	A1	B1	A1	A1	A3	B3	A3	B3	A1B1-A1A1	A3B3-A3B3	A1B1-A3B3	A1A1-A3B3	A1B1-A1A1-A3B3-A3B3		A1B1-B3B3	6	0.125	4.25		0.176471	6		A1B1-B3B3	3	0.125	4.25		0.0294118	1
S1-VP11-25	NO	A1	B1	A1	A1	B3	B3	A3	B3	A1B1-A1A1	B3B3-A3B3	A1B1-B3B3	A1A1-A3B3	A1B1-A1A1-B3B3-A3B3		B1B1-B3B3	1	0.0625	2.125		0.0294118	1		B1B1-B3B3	0	0.0625	2.125		0
S1-VP11-26	YES	A1	B1	B1	B1	A3	A3	A3	A3	A1B1-B1B1	A3A3-A3A3	A1B1-A3A3	B1B1-A3A3	A1B1-B1B1-A3A3-A3A3			34	1	34		1				34	1	34		1
S1-VP11-27	YES	A1	B1	A1	B1	B3	B3	A3	B3	A1B1-A1B1	B3B3-A3B3	A1B1-B3B3	A1B1-A3B3	A1B1-A1B1-B3B3-A3B3
S1-VP11-28	YES	A1	B1	A1	B1	B3	B3	A3	B3	A1B1-A1B1	B3B3-A3B3	A1B1-B3B3	A1B1-A3B3	A1B1-A1B1-B3B3-A3B3
S1-VP11-29	YES	A1	B1	B1	B1	A3	B3	A3	B3	A1B1-B1B1	A3B3-A3B3	A1B1-A3B3	B1B1-A3B3	A1B1-B1B1-A3B3-A3B3
S1-VP11-30	YES	A1	B1	A1	B1	A3	B3	A3	B3	A1B1-A1B1	A3B3-A3B3	A1B1-A3B3	A1B1-A3B3	A1B1-A1B1-A3B3-A3B3			COUNT
S1-VP11-31	YES	A1	B1	A1	A1	A3	B3	A3	B3	A1B1-A1A1	A3B3-A3B3	A1B1-A3B3	A1A1-A3B3	A1B1-A1A1-A3B3-A3B3		A1
S1-VP11-32	NO	A1	A1	A1	B1	B3	B3	B3	B3	A1A1-A1B1	B3B3-B3B3	A1A1-B3B3	A1B1-B3B3	A1A1-A1B1-B3B3-B3B3
S1-VP11-33	YES	A1	B1	A1	B1	A3	B3	A3	B3	A1B1-A1B1	A3B3-A3B3	A1B1-A3B3	A1B1-A3B3	A1B1-A1B1-A3B3-A3B3
S1-VP11-34	YES	A1	B1	A1	B1	A3	B3	A3	B3	A1B1-A1B1	A3B3-A3B3	A1B1-A3B3	A1B1-A3B3	A1B1-A1B1-A3B3-A3B3
S1-VP11-35	YES	A1	B1	A1	B1	A3	B3	A3	B3	A1B1-A1B1	A3B3-A3B3	A1B1-A3B3	A1B1-A3B3	A1B1-A1B1-A3B3-A3B3
S1-VP11-36	YES	A1	B1	A1	B1	A3	A3	A3	B3	A1B1-A1B1	A3A3-A3B3	A1B1-A3A3	A1B1-A3B3	A1B1-A1B1-A3A3-A3B3

## Sheet: TableS9 (2)
Supplementary Table S8. SNP segregation from chromosomes 1 and 3 in RJ51 clone and S1 population.
Segregation analysis of heterozygous single nucleotide polymorphisms (SNPs) was performed as validation of the event Tra1-3 as a heterozygous reciprocal translocation. Chi-squared was performed to evaluate ligation between SNP amplicons. Chi-squared was performed to evaluate ligation between SNP amplicons.
INDIVIDUAL	TRA1-3	1UP	1UP	1DOWN	1DOWN	3UP	3UP	3DOWN	3DOWN	1UP1DOWN	3UP3DOWN	1UP3UP	1DOWN3DOWN		1UP - 1DOWN						3UP - 3DOWN
RJ51	NO	A1	B1	A1	B1	A3	B3	A3	B3	A1B1-A1B1	A3B3-A3B3	A1B1-A3B3	A1B1-A3B3		ALLELE SEGREGATION	OBS.	FREQ.	EXP.	CHI2	OBS. FREQ.	ALLELE SEGREGATION	OBS.	FREQ.	EXP.	CHI2	OBS. FREQ.
S1-RJ51-02	NO	A1	B1	A1	B1	A3	B3	B3	B3	A1B1-A1B1	A3B3-B3B3	A1B1-A3B3	A1B1-B3B3		A1A1-A1A1	4	0.0625	2.125	0.0250449	0.117647	A3A3-A3A3	7	0.0625	2.125	0.00376311	0.205882
S1-RJ51-04	NO	A1	B1	A1	B1	A3	B3	A3	B3	A1B1-A1B1	A3B3-A3B3	A1B1-A3B3	A1B1-A3B3		A1B1-A1A1	4	0.125	4.25		0.117647	A3B3-A3A3	4	0.125	4.25		0.117647
S1-RJ51-08	NO	A1	B1	A1	B1	B3	B3	A3	B3	A1B1-A1B1	B3B3-A3B3	A1B1-B3B3	A1B1-A3B3		B1B1-A1A1	0	0.0625	2.125		0	B3B3-A3A3	2	0.0625	2.125		0.0588235
S1-RJ51-09	NO	A1	A1	A1	A1	A3	B3	B3	B3	A1A1-A1A1	A3B3-B3B3	A1A1-A3B3	A1A1-B3B3		A1A1-A1B1	4	0.125	4.25		0.117647	A3A3-A3B3	1	0.125	4.25		0.0294118
S1-RJ51-10	NO	A1	A1	A1	B1	A3	A3	A3	B3	A1A1-A1B1	A3A3-A3B3	A1A1-A3A3	A1B1-A3B3		A1B1-A1B1	16	0.25	8.5		0.470588	A3B3-A3B3	10	0.25	8.5		0.294118
S1-RJ51-11	NO	A1	A1	A1	B1	B3	B3	A3	A3	A1A1-A1B1	B3B3-A3A3	A1A1-B3B3	A1B1-A3A3		B1B1-A1B1	0	0.125	4.25		0	B3B3-A3B3	8	0.125	4.25		0.235294
S1-RJ51-15	NO	A1	B1	A1	A1	A3	B3	A3	B3	A1B1-A1A1	A3B3-A3B3	A1B1-A3B3	A1A1-A3B3		A1A1-B1B1	0	0.0625	2.125		0	A3A3-B3B3	0	0.0625	2.125		0
S1-RJ51-16	NO	A1	B1	A1	B1	A3	B3	A3	B3	A1B1-A1B1	A3B3-A3B3	A1B1-A3B3	A1B1-A3B3		A1B1-B1B1	3	0.125	4.25		0.0882353	A3B3-B3B3	2	0.125	4.25		0.0588235
S1-RJ51-17	NO	B1	B1	B1	B1	B3	B3	A3	B3	B1B1-B1B1	B3B3-A3B3	B1B1-B3B3	B1B1-A3B3		B1B1-B1B1	3	0.0625	2.125		0.0882353	B3B3-B3B3	0	0.0625	2.125		0
S1-RJ51-20	NO	A1	B1	A1	A1	A3	B3	A3	A3	A1B1-A1A1	A3B3-A3A3	A1B1-A3B3	A1A1-A3A3			34	1	34		1		34	1	34		1
S1-RJ51-21	NO	A1	B1	A1	B1	A3	A3	A3	A3	A1B1-A1B1	A3A3-A3A3	A1B1-A3A3	A1B1-A3A3
S1-RJ51-22	NO	A1	B1	A1	B1	B3	B3	A3	B3	A1B1-A1B1	B3B3-A3B3	A1B1-B3B3	A1B1-A3B3
S1-RJ51-24	NO	B1	B1	B1	B1	A3	A3	A3	A3	B1B1-B1B1	A3A3-A3A3	B1B1-A3A3	B1B1-A3A3		1UP - 3UP						1DOWN - 3DOWN
S1-RJ51-26	NO	A1	B1	B1	B1	A3	A3	A3	A3	A1B1-B1B1	A3A3-A3A3	A1B1-A3A3	B1B1-A3A3		ALLELE SEGREGATION	OBS.	FREQ.	EXP.	CHI2	OBS. FREQ.	ALLELE SEGREGATION	OBS.	FREQ.	EXP.	CHI2	OBS. FREQ.
S1-RJ51-31	NO	A1	A1	A1	A1	B3	B3	A3	B3	A1A1-A1A1	B3B3-A3B3	A1A1-B3B3	A1A1-A3B3		A1A1-A3A3	2	0.0625	2.125	0.367712	0.0588235	A1A1-A3A3	2	0.0625	2.125	0.179441	0.0588235
S1-RJ51-34	NO	A1	A1	A1	B1	A3	B3	A3	A3	A1A1-A1B1	A3B3-A3A3	A1A1-A3B3	A1B1-A3A3		A1B1-A3A3	4	0.125	4.25		0.117647	A1B1-A3A3	7	0.125	4.25		0.205882
S1-RJ51-42	NO	A1	B1	A1	B1	A3	B3	A3	B3	A1B1-A1B1	A3B3-A3B3	A1B1-A3B3	A1B1-A3B3		B1B1-A3A3	2	0.0625	2.125		0.0588235	B1B1-A3A3	4	0.0625	2.125		0.117647
S1-RJ51-47	NO	A1	B1	A1	B1	A3	B3	A3	A3	A1B1-A1B1	A3B3-A3A3	A1B1-A3B3	A1B1-A3A3		A1A1-A3B3	3	0.125	4.25		0.0882353	A1A1-A3B3	5	0.125	4.25		0.147059
S1-RJ51-51	NO	A1	B1	A1	B1	B3	B3	A3	A3	A1B1-A1B1	B3B3-A3A3	A1B1-B3B3	A1B1-A3A3		A1B1-A3B3	13	0.25	8.5		0.382353	A1B1-A3B3	12	0.25	8.5		0.352941
S1-RJ51-56	NO	A1	B1	A1	B1	A3	B3	A3	B3	A1B1-A1B1	A3B3-A3B3	A1B1-A3B3	A1B1-A3B3		B1B1-A3B3	0	0.125	4.25		0	B1B1-A3B3	2	0.125	4.25		0.0588235
S1-RJ51-61	NO	A1	B1	A1	B1	A3	B3	A3	A3	A1B1-A1B1	A3B3-A3A3	A1B1-A3B3	A1B1-A3A3		A1A1-B3B3	3	0.0625	2.125		0.0882353	A1A1-B3B3	1	0.0625	2.125		0.0294118
S1-RJ51-73	NO	A1	B1	B1	B1	A3	B3	A3	B3	A1B1-B1B1	A3B3-A3B3	A1B1-A3B3	B1B1-A3B3		A1B1-B3B3	6	0.125	4.25		0.176471	A1B1-B3B3	1	0.125	4.25		0.0294118
S1-RJ51-87	NO	A1	A1	A1	A1	B3	B3	A3	B3	A1A1-A1A1	B3B3-A3B3	A1A1-B3B3	A1A1-A3B3		B1B1-B3B3	1	0.0625	2.125		0.0294118	B1B1-B3B3	0	0.0625	2.125		0
S1-RJ51-94	NO	A1	B1	A1	B1	B3	B3	A3	B3	A1B1-A1B1	B3B3-A3B3	A1B1-B3B3	A1B1-A3B3			34	1	34		1		34	1	34		1
S1-RJ51-100	NO	B1	B1	B1	B1	A3	A3	A3	A3	B1B1-B1B1	A3A3-A3A3	B1B1-A3A3	B1B1-A3A3
S1-RJ51-111	NO	A1	B1	A1	B1	B3	B3	A3	B3	A1B1-A1B1	B3B3-A3B3	A1B1-B3B3	A1B1-A3B3
S1-RJ51-120	NO	A1	B1	A1	A1	A3	A3	A3	A3	A1B1-A1A1	A3A3-A3A3	A1B1-A3A3	A1A1-A3A3
S1-RJ51-121	NO	A1	B1	A1	A1	A3	B3	A3	B3	A1B1-A1A1	A3B3-A3B3	A1B1-A3B3	A1A1-A3B3
S1-RJ51-126	NO	A1	A1	A1	A1	A3	B3	A3	B3	A1A1-A1A1	A3B3-A3B3	A1A1-A3B3	A1A1-A3B3
S1-RJ51-130	NO	A1	B1	A1	B1	B3	B3	A3	B3	A1B1-A1B1	B3B3-A3B3	A1B1-B3B3	A1B1-A3B3
S1-RJ51-132	NO	A1	B1	A1	B1	A3	B3	A3	B3	A1B1-A1B1	A3B3-A3B3	A1B1-A3B3	A1B1-A3B3
S1-RJ51-140	NO	A1	B1	B1	B1	A3	A3	A3	A3	A1B1-B1B1	A3A3-A3A3	A1B1-A3A3	B1B1-A3A3
S1-RJ51-145	NO	A1	A1	A1	B1	A3	A3	A3	A3	A1A1-A1B1	A3A3-A3A3	A1A1-A3A3	A1B1-A3A3
S1-RJ51-150	NO	A1	B1	A1	B1	A3	B3	A3	B3	A1B1-A1B1	A3B3-A3B3	A1B1-A3B3	A1B1-A3B3

## Sheet: TableS7
Supplementary Table S7. SSR marker segregation in the VP11 S1 population.
Segregation patterns of heterozygous SSR markers: seven markers from the initial multiplex PCR were used for genetic origin and microsatellite marker VVIB23 was employed for flower type identification. Genotype frequencies were estimated to evaluate deviations of SSR segregation in the progeny using Chi-squared tests. Expected = number of expected individuals per each genotype for equal allele fr…
S1 VP11 - SSR segregation analysis
VVMD32	OBSERVED	EXPECTED	χ2
aa	6	8.5
ab	13	17	0.0360255
bb	15	8.5
	34	34
VVMD7	OBSERVED	EXPECTED	χ2
aa	7	8.5
ab	20	17	0.588951
bb	7	8.5
	34	34
VVS2	OBSERVED	EXPECTED	χ2
aa	14	8.5
ab	17	17	0.028
bb	3	8.5
	34	34
VrZAG62	OBSERVED	EXPECTED	χ2
aa	8	8.5
ab	18	17	0.942873
bb	8	8.5
	34	34
VrZAG79	OBSERVED	EXPECTED	χ2
aa	3	8.25
ab	20	16.5	0.107822
bb	10	8.25
	33	33
VVIB23	OBSERVED	EXPECTED	χ2
aa	6	8.5
ab	15	17	0.187
bb	13	8.5
	34	34
	chr05	chr05	chr04	chr04	chr16	chr16	chr07	chr07	chr11	chr11	chr07	chr07	chr05	chr05	chr02	chr02
INDIVIDUAL	VVMD27	VVMD27	VVMD32	VVMD32	VVMD5	VVMD5	VVMD7	VVMD7	VVS2	VVS2	VrZAG62	VrZAG62	VrZAG79	VrZAG79	VVIB23	VVIB23	FLOWER SEX Phenotype
VP11	181	181	249	251	233	233	237	251	142	144	196	200	247	251	284	302	Hermaphrodite
TT Control	181	181	249	251	233	233	237	251	142	144	196	200	247	251	284	302	Hermaphrodite
S1-VP11-01	181	181	249	251	233	233	237	251	142	142	196	200	247	251	302	302	Female
S1-VP11-02	181	181	251	251	233	233	237	251	142	144	196	200	NA	NA	284	302	Hermaphrodite
S1-VP11-03	181	181	249	251	233	233	251	251	144	144	200	200	247	251	284	284	Hermaphrodite
S1-VP11-04	181	181	249	249	233	233	237	237	142	144	196	200	247	251	284	302	Hermaphrodite
S1-VP11-05	181	181	249	251	233	233	237	251	142	142	196	200	247	251	284	302	Hermaphrodite
S1-VP11-06	181	181	249	251	233	233	251	251	142	142	200	200	247	251	284	284	Hermaphrodite
S1-VP11-07	181	181	251	251	233	233	251	251	142	142	200	200	247	251	284	302	Hermaphrodite
S1-VP11-08	181	181	251	251	233	233	237	251	142	142	196	200	247	251	302	302	Female
S1-VP11-09	181	181	251	251	233	233	237	251	142	144	200	200	251	251	284	302	Hermaphrodite
S1-VP11-10	181	181	249	251	233	233	237	251	142	144	196	200	251	251	284	284	Hermaphrodite
S1-VP11-11	181	181	251	251	233	233	237	237	142	144	196	196	247	251	284	302	Hermaphrodite
S1-VP11-13	181	181	249	251	233	233	237	237	142	142	196	196	247	247	302	302	Female
S1-VP11-14	181	181	251	251	233	233	237	251	142	144	196	200	247	251	302	302	Female
S1-VP11-15	181	181	251	251	233	233	251	251	142	144	200	200	247	251	284	302	Hermaphrodite
S1-VP11-16	181	181	249	251	233	233	237	251	142	142	196	200	247	251	284	302	Hermaphrodite
S1-VP11-17	181	181	251	251	233	233	237	237	142	142	196	196	247	247	284	302	Hermaphrodite
S1-VP11-18	181	181	251	251	233	233	237	251	142	144	196	200	247	251	284	302	Hermaphrodite
S1-VP11-19	181	181	251	251	233	233	237	251	142	144	196	200	247	251	284	302	Hermaphrodite
S1-VP11-20	181	181	251	251	233	233	237	237	142	144	196	196	247	247	284	302	Hermaphrodite
S1-VP11-21	181	181	249	249	233	233	237	251	142	142	196	200	247	251	302	302	Female
S1-VP11-22	181	181	249	251	233	233	237	251	142	144	196	200	247	251	302	302	Female
S1-VP11-24	181	181	249	249	233	233	237	237	142	144	196	196	251	251	284	284	Hermaphrodite
S1-VP11-25	181	181	249	251	233	233	237	251	144	144	196	200	247	251	302	302	Female
S1-VP11-26	181	181	251	251	233	233	237	251	142	142	196	200	247	251	302	302	Female
S1-VP11-27	181	181	249	249	233	233	237	237	142	144	196	196	247	251	284	302	Hermaphrodite
S1-VP11-28	181	181	249	251	233	233	237	251	142	144	196	200	251	251	284	284	Hermaphrodite
S1-VP11-29	181	181	251	251	233	233	237	251	142	144	196	200	251	251	284	302	Hermaphrodite
S1-VP11-30	181	181	249	249	233	233	237	251	142	144	196	200	251	251	302	302	Female
S1-VP11-31	181	181	251	251	233	233	251	251	142	142	200	200	251	251	302	302	Female
S1-VP11-32	181	181	249	249	233	233	251	251	142	142	200	200	251	251	284	284	Hermaphrodite
S1-VP11-33	181	181	249	251	233	233	237	251	142	142	196	196	251	251	302	302	Female
S1-VP11-34	181	181	249	251	233	233	237	251	142	142	196	196	251	251	302	302	Female
S1-VP11-35	181	181	249	251	233	233	237	251	142	144	196	200	247	251	284	302	Hermaphrodite
S1-VP11-36	181	181	251	251	233	233	251	251	144	144	200	200	247	251	302	302	Female

[truncated: 3 more sheets: TableS8, TableS9, TableS10]
